# Supplementary material for: Single band ratiometric luminescence thermometry based on Pr3+ doped oxides containing charge transfer states
Source: Royal Society of Chemistry journal article supplement (doi:10.1039/d2tc02336a), 2022-01-01
Supplement: d2tc02336a1.pdf [file d2tc02336a1.pdf]

## Electronic Supplementary Information

### Single band ratiometric luminescence thermometry based on Pr<sup>3+</sup> doped oxides containing charge transfer states

Jiawen Wang,<sup>ab</sup> Junyi Li,<sup>b</sup> Ruoshan Lei,<sup>\*b</sup> Shilong Zhao<sup>b</sup> and Shiqing Xu<sup>\*b</sup>

<sup>a</sup> College of Materials and Chemistry, China Jiliang University, Hangzhou, 310018, China

<sup>b</sup> Institute of Optoelectronic Materials and Devices, China Jiliang University, Hangzhou, 310018,

China

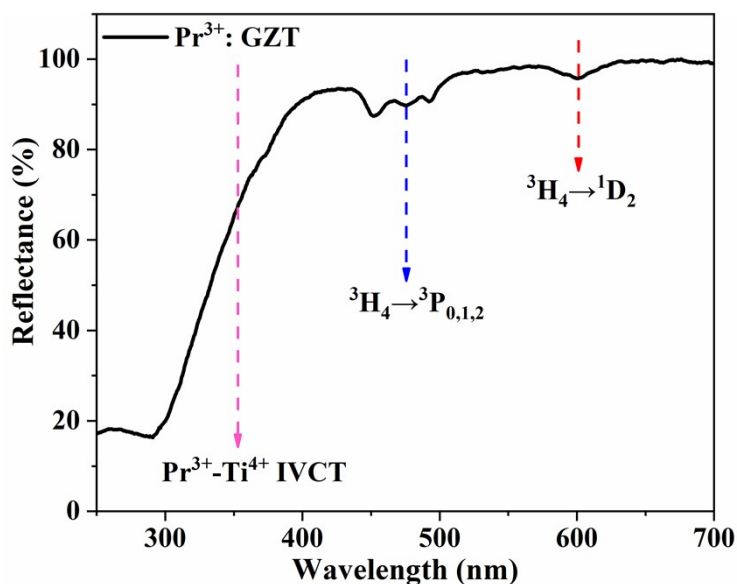

Fig. S1. Diffuse reflectance spectrum of the Pr<sup>3+</sup>: GZT phosphor.

**Supplementary Note 1. The calculation of IVCT energy.** According to previous studies, the position of the IVCT band will affect the electron distribution between the  $^3P_0$  and  $^1D_2$  energy levels. Boutinaud et al. have proposed an empirical equation to evaluate the energy of  $Pr^{3+}-Ti^{4+}$  IVCT as follows:<sup>1,2</sup>

$$IVCT(cm^{-1}) = 58800 - 49800 \left[ \frac{\chi(Ti^{4+})}{d(Pr^{3+} - Ti^{4+})} \right] \quad (S1)$$

where  $\chi(Ti^{4+})$  is the optical electronegativity of  $Ti^{4+}$  (2.05), and  $d(Pr^{3+} - Ti^{4+})$  is the average distance between  $Pr^{3+}$  and  $Ti^{4+}$ . For  $Pr^{3+}$ : GZT, the mean distance between  $Gd^{3+}-Ti^{4+}$  is  $\sim 3.37 \text{ \AA}$  based on the crystal structure data (ICSD-251934).<sup>3</sup> Accordingly, the calculated IVCT energy is  $\sim 351 \text{ nm}$  ( $28520 \text{ cm}^{-1}$ ), which is consistent with the experimental data detected in the excitation spectrum ( $340 \text{ nm}$ ,  $29412 \text{ cm}^{-1}$ ).

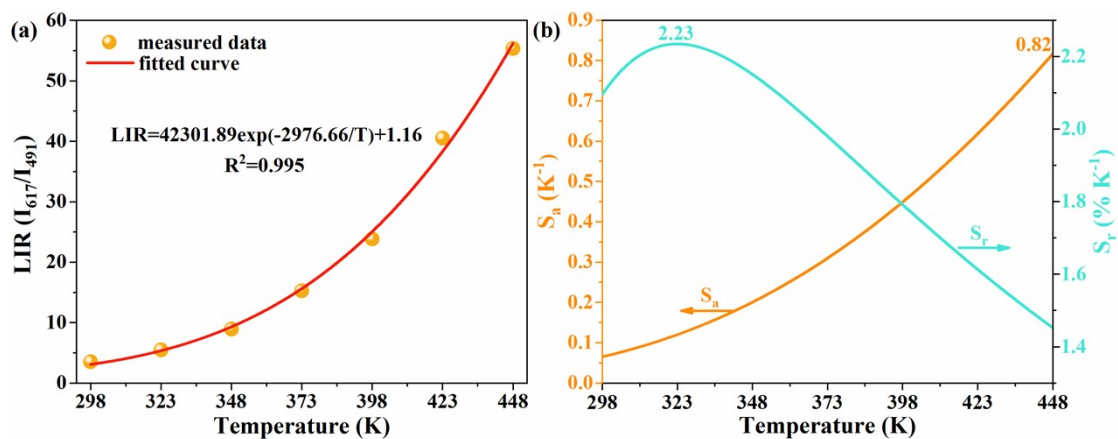

Fig. S2. (a) Experimentally measured and fitted plot of  $LIR = I_{617} / I_{491}$  versus temperature. (b) The corresponding  $S_a$  and  $S_r$  as a function of temperature.

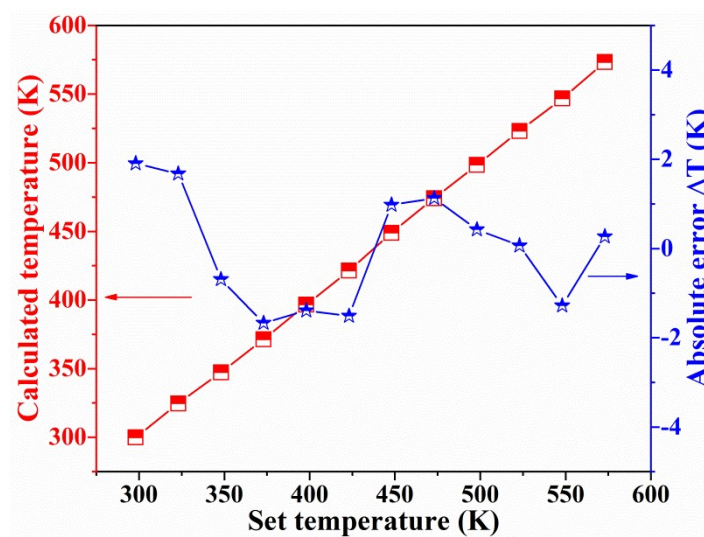

Fig. S3. Absolute error ( $\Delta T$ ) as a function of temperature for  $LIR_{3P_0 \rightarrow 3H_4} (I_{EX:f-f} / I_{EX:IVCT})$  data.

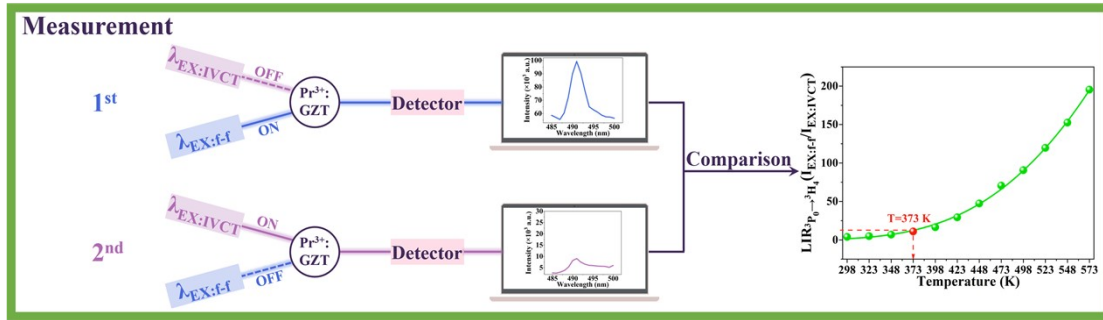

Fig. S4. Schematic diagram of the present SBR method in  $\text{Pr}^{3+}$ : GZT.

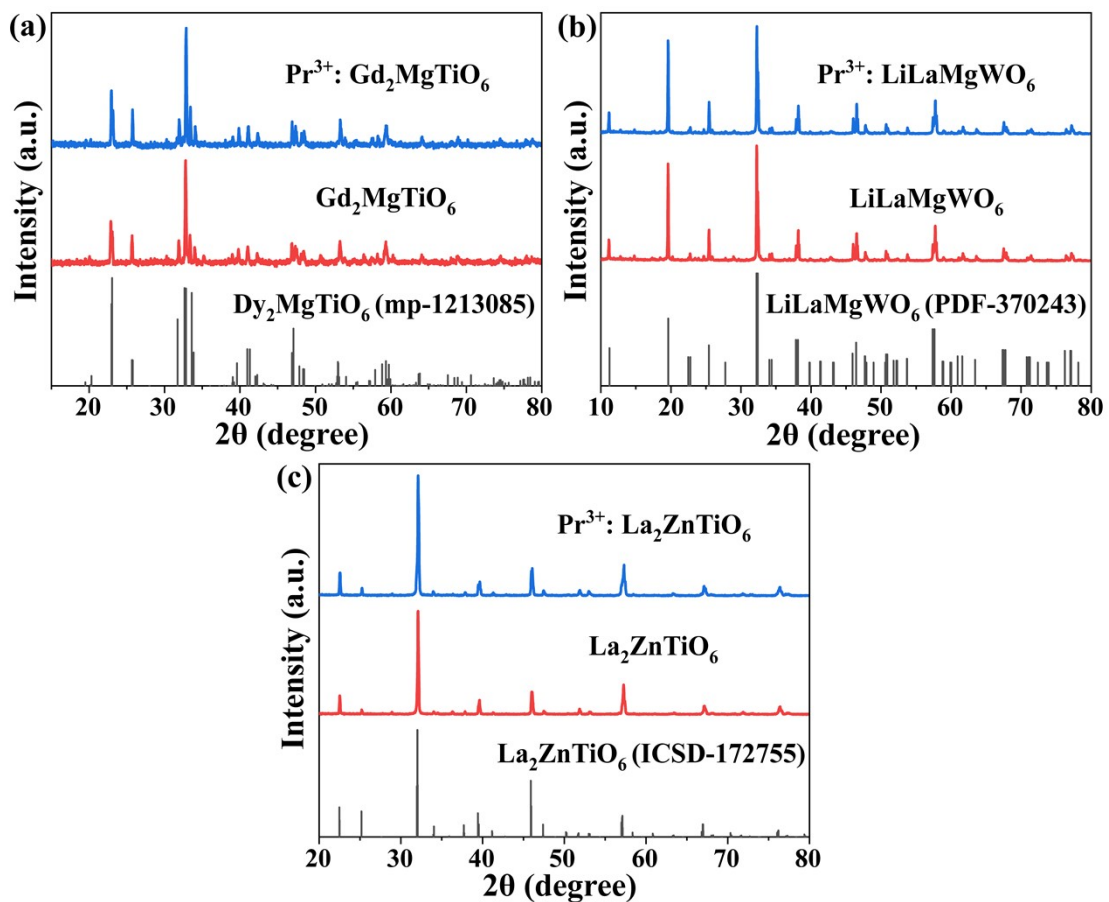

Fig. S5. (a) XRD patterns of  $\text{Gd}_2\text{MgTiO}_6$  and  $\text{Pr}^{3+}$ :  $\text{Gd}_2\text{MgTiO}_6$  samples. Due to the lack of structural information of  $\text{Gd}_2\text{MgTiO}_6$  in the crystal database, the standard data of  $\text{Dy}_2\text{MgTiO}_6$  with an analogous structure (mp-1213085) is used as a reference. (b) XRD patterns of  $\text{LiLaMgWO}_6$  and  $\text{Pr}^{3+}$ :  $\text{LiLaMgWO}_6$  samples, and the standard data of  $\text{LiLaMgWO}_6$  (PDF-370243) is used as a reference. (c) XRD patterns of  $\text{La}_2\text{ZnTiO}_6$  and  $\text{Pr}^{3+}$ :  $\text{La}_2\text{ZnTiO}_6$  samples with the standard data of  $\text{La}_2\text{ZnTiO}_6$  (ICSD-172755) as a reference.

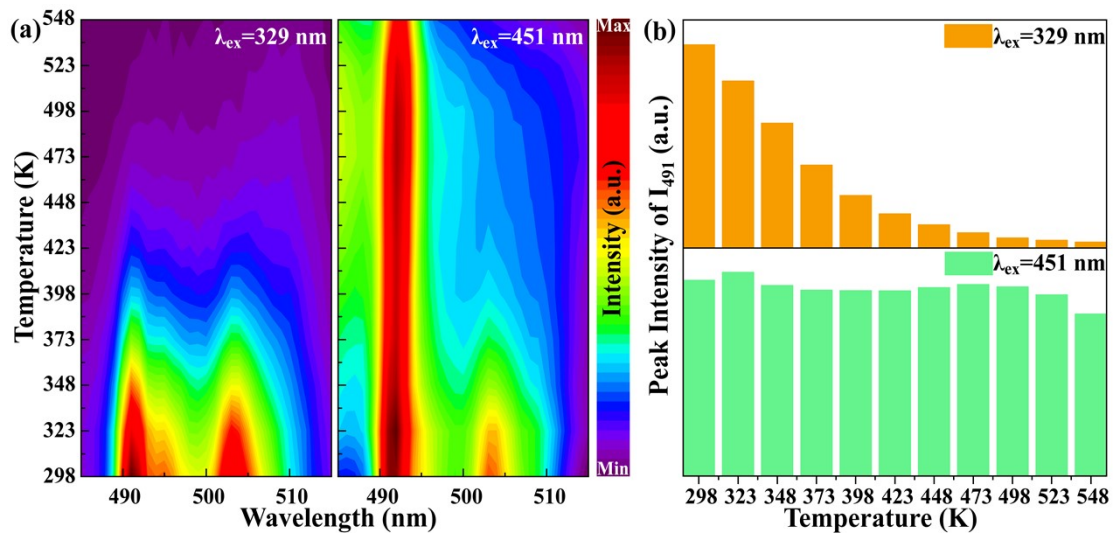

**Fig. S6.** (a) Temperature-dependent PL spectra of  $\text{Pr}^{3+}$ :  $\text{Gd}_2\text{MgTiO}_6$  upon the excitations of  $\text{Pr}^{3+}\text{-Ti}^{4+}$  IVCT ( $\lambda_{\text{ex}}=329$  nm) and  $\text{Pr}^{3+}$ :  ${}^3\text{H}_4 \rightarrow {}^3\text{P}_2$  transition ( $\lambda_{\text{ex}}=451$  nm). (b) Temperature-variational intensities of the 491 nm emission ( $\text{Pr}^{3+}$ :  ${}^3\text{P}_0 \rightarrow {}^3\text{H}_4$  transition) under two different excitation lines ( $\lambda_{\text{ex}}=329$  and 451 nm).

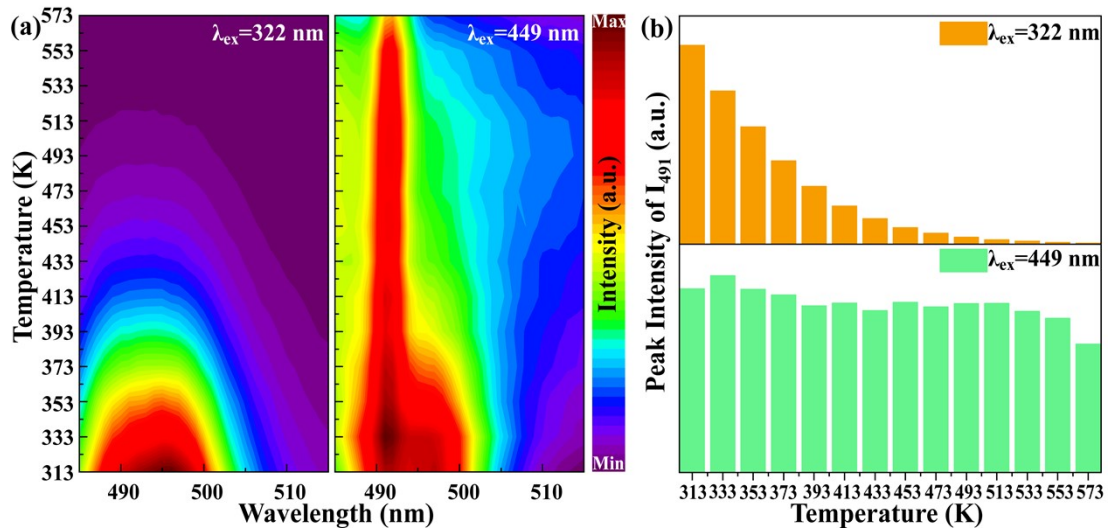

**Fig. S7.** (a) Temperature-dependent PL spectra of  $\text{Pr}^{3+}$ :  $\text{LiLaMgWO}_6$  upon the excitations of  $\text{Pr}^{3+}\text{-W}^{6+}$  IVCT ( $\lambda_{\text{ex}}=322$  nm) and  $\text{Pr}^{3+}$ :  ${}^3\text{H}_4 \rightarrow {}^3\text{P}_2$  transition ( $\lambda_{\text{ex}}=449$  nm). (b) Temperature-variational intensities of the 491 nm emission ( $\text{Pr}^{3+}$ :  ${}^3\text{P}_0 \rightarrow {}^3\text{H}_4$  transition) under two different excitation lines ( $\lambda_{\text{ex}}=322$  and 449 nm).

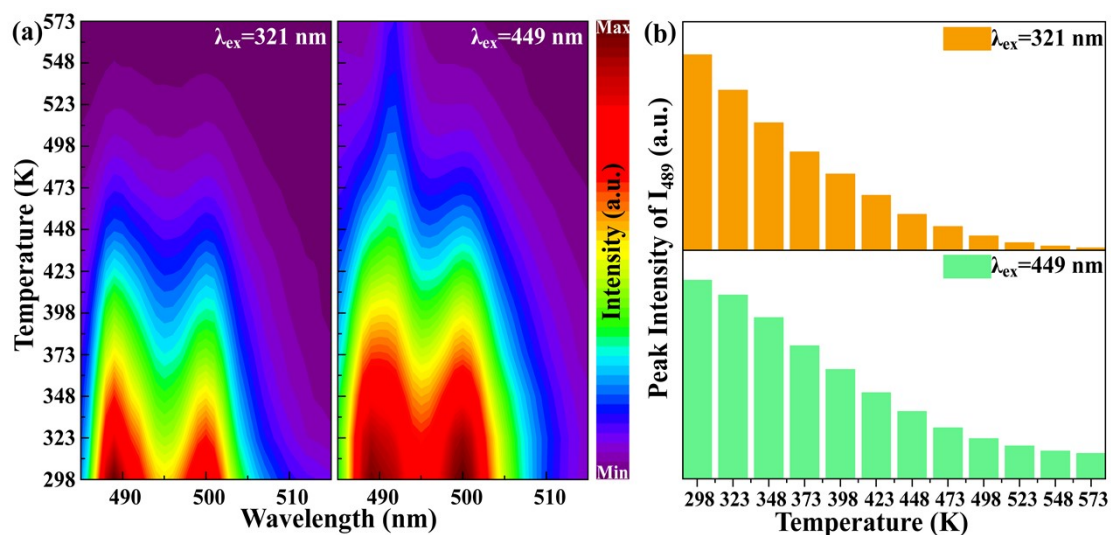

**Fig. S8.** (a) Temperature-dependent PL spectra of Pr<sup>3+</sup>: La<sub>2</sub>ZnTiO<sub>6</sub> upon the excitations of the Pr<sup>3+</sup>-Ti<sup>4+</sup> IVCT state ( $\lambda_{\text{ex}}=321$  nm) and Pr<sup>3+</sup>: <sup>3</sup>H<sub>4</sub>→<sup>3</sup>P<sub>2</sub> transition ( $\lambda_{\text{ex}}=449$  nm). (b) Temperature-variational intensities of the 489 nm emission (Pr<sup>3+</sup>:<sup>3</sup>P<sub>0</sub>→<sup>3</sup>H<sub>4</sub> transition) under two different excitation lines ( $\lambda_{\text{ex}}=321$  and 449 nm).

## References

- 1 Y. Gao, F. Huang, H. Lin, J. Xu and Y. Wang, *Sens. Actuators B Chem.*, 2017, **243**, 137-143.
- 2 R. Shi, L. Lin, P. Dorenbos and H. Liang, *J. Mater. Chem. C*, 2017, **5**, 10737-10745.
- 3 N. Das, M. A. Nath, G. S. Thakur, M. Thirumal and A. K. Ganguli, *J. Solid State Chem.*, 2015, **229**, 97-102.
